# Supplementary material for: Acute Running and Coronary Heart Disease Risk Markers in Male Cigarette Smokers and Nonsmokers: A Randomized Crossover Trial
Source: PubMed Central journal article supplement — Med Sci Sports Exerc. 2020 Nov 16;53(5):1021–32. doi: 10.1249/MSS.0000000000002560 (PMC8048727; doi:10.1249/mss.0000000000002560), 2020-11-16
Supplement: mss-53-1021-s002.pdf [file mss-53-1021-s002.pdf]

**Acute running and coronary heart disease risk markers in male cigarette smokers and non-smokers: a randomised crossover trial**

**Authors:** Tareq F. Alotaibi, Alice E. Thackray, Matthew J. Roberts, Turki M. Alanazi, Nicolette C. Bishop, Alex J. Wadley, James A. King, Emma O'Donnell, Michael C. Steiner, Sally J. Singh, David J. Stensel

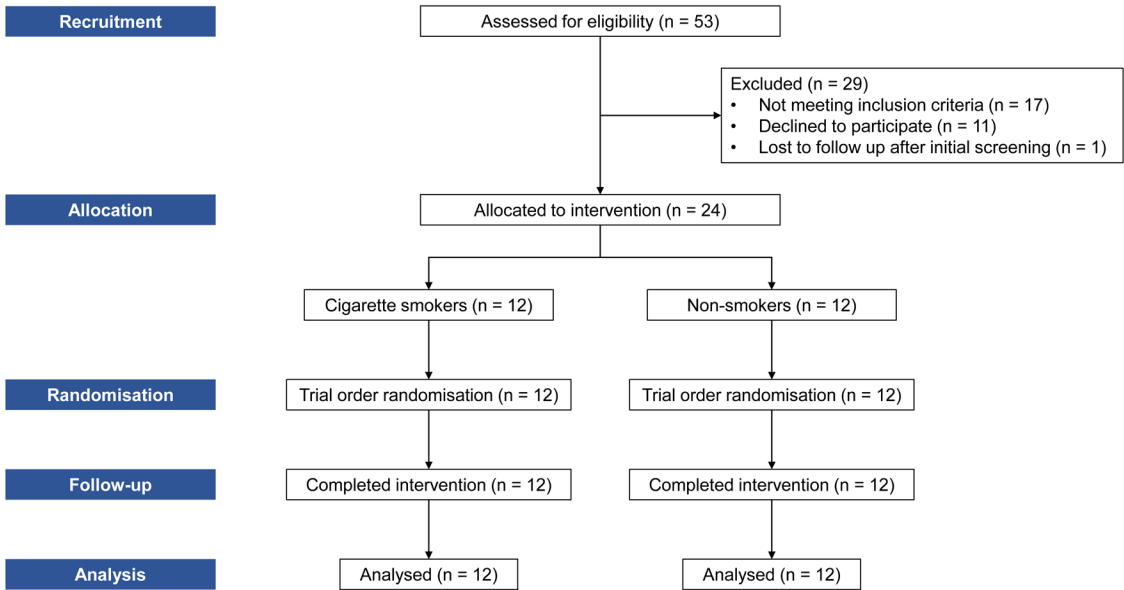

Supplemental Figure 1. Participant flow chart
