# Supplementary material for: Acute Running and Coronary Heart Disease Risk Markers in Male Cigarette Smokers and Nonsmokers: A Randomized Crossover Trial
Source: PubMed Central journal article supplement — Med Sci Sports Exerc. 2020 Nov 16;53(5):1021–32. doi: 10.1249/MSS.0000000000002560 (PMC8048727; doi:10.1249/mss.0000000000002560), 2020-11-16
Supplement: mss-53-1021-s003.pdf [file mss-53-1021-s003.pdf]

**Acute running and coronary heart disease risk markers in male cigarette smokers and non-smokers: a randomised crossover trial**

**Authors:** Tareq F. Alotaibi, Alice E. Thackray, Matthew J. Roberts, Turki M. Alanazi, Nicolette C. Bishop, Alex J. Wadley, James A. King, Emma O'Donnell, Michael C. Steiner, Sally J. Singh, David J. Stensel

**Supplemental Table 1.** Time-averaged total area under the curve values (0-8 h) for postprandial plasma concentrations and resting arterial blood pressure on day 2 of the control and exercise conditions in cigarette smokers and non-smokers.

|                           | Cigarette smokers ( <i>n</i> = 12) |                   | Non-smokers ( <i>n</i> = 12) |                   | Non-smokers vs cigarette smokers      |          | Control vs exercise                   |          |
|---------------------------|------------------------------------|-------------------|------------------------------|-------------------|---------------------------------------|----------|---------------------------------------|----------|
|                           | Control                            | Exercise          | Control                      | Exercise          | Mean difference (95% CI) <sup>1</sup> | <i>d</i> | Mean difference (95% CI) <sup>1</sup> | <i>d</i> |
| <b>TAG (mmol/L h)</b>     | 2.22 (1.71, 2.88)                  | 2.04 (1.59, 2.63) | 1.39 (0.99, 1.96)            | 1.08 (0.84, 1.39) | 73% (21, 148%) <sup>2</sup>           | 1.15     | -15% (-23, -7%) <sup>3</sup>          | 0.35     |
| <b>NEFA (mmol/L h)</b>    | 0.32 (0.07)                        | 0.34 (0.07)       | 0.31 (0.08)                  | 0.36 (0.10)       | -0.01 (-0.07, 0.05)                   | 0.09     | 0.03 (0.00, 0.06) <sup>3</sup>        | 0.41     |
| <b>Glucose (mmol/L h)</b> | 4.97 (0.37)                        | 5.04 (0.45)       | 4.88 (0.50)                  | 4.83 (0.42)       | 0.15 (-0.18, 0.48)                    | 0.34     | 0.01 (-0.16, 0.18)                    | 0.03     |
| <b>Insulin (pmol/L h)</b> | 161 (122, 212)                     | 134 (103, 175)    | 125 (93, 167)                | 117 (95, 142)     | 22% (-12, 69%)                        | 0.44     | -12% (-21, -1%) <sup>3</sup>          | 0.28     |
| <b>CRP (mg/L h)</b>       | 1.01 (0.61, 1.68)                  | 1.44 (0.76, 2.71) | 0.38 (0.20, 0.73)            | 0.67 (0.32, 1.39) | 139% (8, 429%) <sup>2</sup>           | 0.94     | 58% (17, 113%) <sup>3</sup>           | 0.50     |
| <b>IL-6 (pg/mL h)</b>     | 2.58 (1.73, 3.84)                  | 2.87 (2.07, 3.98) | 2.36 (1.49, 3.75)            | 2.48 (1.85, 3.34) | 12% (-29, 78%)                        | 0.17     | 8% (-12, 32%)                         | 0.11     |
| <b>SOD3 (ng/mL h)</b>     | 1.05 (0.80, 1.39)                  | 1.03 (0.79, 1.34) | 0.80 (0.55, 1.15)            | 0.76 (0.54, 1.06) | 34% (-12, 103%)                       | 0.57     | -4% (-9, 2%)                          | 0.08     |
| <b>PRDX-4 (ng/mL h)</b>   | 12.7 (10.6, 15.3)                  | 13.1 (11.1, 15.5) | 12.5 (10.6, 14.6)            | 11.9 (10.2, 14.0) | 6% (-14, 31%)                         | 0.21     | -1% (-8, 8%)                          | 0.03     |
| <b>SBP (mmHg h)</b>       | 132 (13)                           | 127 (9)           | 130 (11)                     | 128 (10)          | 0 (-8, 9)                             | 0.04     | -3 (-7, -0.2) <sup>3</sup>            | 0.28     |
| <b>DBP (mmHg h)</b>       | 71 (8)                             | 67 (6)            | 68 (6)                       | 68 (5)            | 1 (-4, 6)                             | 0.11     | -2 (-4, -0.1) <sup>3</sup>            | 0.32     |

Values for TAG, insulin, CRP, IL-6, SOD3 and PRDX4 are geometric mean (95% CI) and statistical analyses are based on log transformed data. All other values are mean (SD). Data were analysed using linear mixed models with group (cigarette smokers or non-smokers) and condition (exercise or control) included as fixed factors.

<sup>1</sup> For normally distributed data, values represent the mean absolute difference (95% CI of the mean absolute difference between the groups or conditions). For log transformed data, values represent the ratio of geometric means (95% CI for the ratio of geometric means between the groups or conditions).

<sup>2</sup> Main effect of group  $P \leq 0.034$ .

<sup>3</sup> Main effect of condition  $P \leq 0.044$ .

Linear mixed models revealed no group-by-condition interactions  $P \geq 0.089$ .

CI, confidence interval; TAG, triacylglycerol; NEFA, non-esterified fatty acids; CRP, C-reactive protein; IL-6, interleukin-6; SOD3, superoxide dismutase 3; PRDX-4, peroxiredoxin 4; SBP, systolic blood pressure; DBP, diastolic blood pressure.
